# Supplementary material for: The trophic and metabolic pathways of foraminifera in the Arabian Sea: evidence from cellular stable isotopes
Source: Copernicus journal article supplement (doi:10.5194/bg-12-1781-2015), 2015-03-18
Supplement: Supplementary file 1 [file bg-12-1781-2015-supplement.pdf]

Supplement of Biogeosciences, 12, 1781–1797, 2015  
<http://www.biogeosciences.net/12/1781/2015/>  
doi:10.5194/bg-12-1781-2015-supplement  
© Author(s) 2015. CC Attribution 3.0 License.

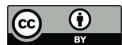

*Supplement of*

## **The trophic and metabolic pathways of foraminifera in the Arabian Sea: evidence from cellular stable isotopes**

**R. M. Jeffreys et al.**

*Correspondence to:* R. M. Jeffreys ([rachel.jeffreys@liv.ac.uk](mailto:rachel.jeffreys@liv.ac.uk))

## Supporting Information

Table S1: Station data for deployments from both margins referred to in the Methods and Figure 1. Exact sampling positions, depths, gear type used and the sample fate.

| Margin   | Discovery # | Latitude (N) | Longitude (E) | Depth (m) | Gear     | Sample Type             |
|----------|-------------|--------------|---------------|-----------|----------|-------------------------|
| Oman     | 55704#2     | 23° 29.57    | 59° 14.06     | 3101      | CTD      | DO profile              |
| Oman     | 55708#1     | 23° 41.47    | 58° 42.32     | 1435      | CTD      | DO profile              |
| Oman     | 55726#3     | 23° 19.99    | 59° 06.81     | 1935      | CTD      | DO profile              |
| Oman     | 55730#1     | 22° 46.40    | 59° 57.30     | 2000      | CTD      | DO profile              |
| Oman     | 55786#1     | 22° 58.01    | 60° 08.21     | 3145      | CTD      | DO profile              |
| Oman     | 55712#1     | 23° 23.07    | 58° 59.03     | 334       | Megacore | Bulk sediment organics  |
| Oman     | 55717#1     | 23° 21.18    | 59° 03.19     | 1341      | Megacore | Bulk sediment organics  |
| Oman     | 55718#3     | 23° 21.67    | 58° 59.30     | 800       | Megacore | Bulk sediment organics  |
| Oman     | 55725#2     | 23° 20.31    | 59° 09.85     | 2010      | Megacore | Bulk sediment organics  |
| Oman     | 55726#1     | 23° 19.87    | 59° 07.34     | 2075      | Megacore | Bulk sediment organics  |
| Oman     | 55730#2     | 22° 46.40    | 59° 57.52     | 1980      | Megacore | Bulk sediment organics  |
| Oman     | 55753#1     | 23° 23.47    | 59° 03.51     | 1093      | Megacore | Bulk sediment organics  |
| Oman     | 55731#1     | 22° 41.51    | 59° 56.01     | 1414      | Megacore | Foraminiferal isotopes  |
| Oman     | 55754#1     | 23° 22.98    | 59° 00.00     | 504       | Megacore | Foraminiferal isotopes  |
| Oman     | 55763#1     | 23° 23.02    | 58° 59.15     | 363       | Megacore | Foraminiferal isotopes  |
| Oman     | 55765#1     | 23° 22.76    | 59° 02.05     | 789       | Megacore | Foraminiferal isotopes  |
| Oman     | 55766#1     | 23° 23.52    | 59° 03.55     | 1103      | Megacore | Foraminiferal isotopes  |
| Oman     | 55767#1     | 23° 22.10    | 59° 05.60     | 1390      | Megacore | Foraminiferal isotopes  |
| Oman     | 55788#1     | 23° 01.00    | 60° 02.98     | 3185      | Megacore | Foraminiferal isotopes  |
| Oman     | 55789#3     | 22° 22.49    | 60° 06.35     | 2030      | Megacore | Foraminiferal isotopes  |
| Pakistan | 56001#1     | 22° 52.34    | 65° 59.58     | 1849      | CTD      | DO profile/POM organics |
| Pakistan | 56011#2     | 22° 59.99    | 66° 24.43     | 1197      | CTD      | DO profile/POM organics |
| Pakistan | 56020#1     | 22° 55.82    | 66° 36.34     | 930       | CTD      | DO profile/POM organics |
| Pakistan | 56028#1     | 23° 12.36    | 66° 33.98     | 307       | CTD      | DO profile/POM organics |
| Pakistan | 56036#3     | 23° 16.43    | 66° 42.76     | 136       | CTD      | DO profile/POM organics |

|          |          |           |           |       |          |                         |
|----------|----------|-----------|-----------|-------|----------|-------------------------|
| Pakistan | 56065#1  | 22° 52.46 | 66° 00.02 | 1847  | CTD      | DO profile/POM organics |
| Pakistan | 56044#3  | 22° 59.92 | 66° 24.06 | 1211  | CTD      | DO profile/POM organics |
| Pakistan | 56031#3  | 23° 16.52 | 66° 42.40 | 134   | Megacore | Bulk sediment organics  |
| Pakistan | 56033#4  | 23° 16.76 | 66° 42.64 | 136   | Megacore | Bulk sediment organics  |
| Pakistan | 56016#3  | 23° 16.92 | 66° 42.74 | 134   | Megacore | Bulk sediment organics  |
| Pakistan | 56101#10 | 23° 16.77 | 66° 42.71 | 131   | Megacore | Bulk sediment organics  |
| Pakistan | 56025#04 | 23° 12.48 | 66° 34.02 | 310   | Megacore | Bulk sediment organics  |
| Pakistan | 56025#05 | 23° 12.54 | 66° 34.03 | 307   | Megacore | Bulk sediment organics  |
| Pakistan | 56025#06 | 23° 12.21 | 66° 33.88 | 314   | Megacore | Bulk sediment organics  |
| Pakistan | 56107#01 | 23° 12.48 | 66° 34.00 | 300.5 | Megacore | Bulk sediment organics  |
| Pakistan | 56015#02 | 22° 55.90 | 66° 36.12 | 958   | Megacore | Bulk sediment organics  |
| Pakistan | 56012#03 | 22° 55.84 | 66° 36.10 | 956   | Megacore | Bulk sediment organics  |
| Pakistan | 56015#03 | 22° 55.88 | 66° 36.09 | 960   | Megacore | Bulk sediment organics  |
| Pakistan | 56116#03 | 22° 53.52 | 66° 36.66 | 942   | Megacore | Bulk sediment organics  |
| Pakistan | 56007#02 | 22° 59.76 | 66° 24.24 | 1215  | Megacore | Bulk sediment organics  |
| Pakistan | 56007#04 | 22° 59.78 | 66° 24.49 | 1203  | Megacore | Bulk sediment organics  |
| Pakistan | 56007#03 | 22° 59.91 | 66° 24.41 | 1205  | Megacore | Bulk sediment organics  |
| Pakistan | 56141#02 | 23° 00.00 | 66° 24.42 | 1198  | Megacore | Bulk sediment organics  |
| Pakistan | 56005#02 | 22° 52.52 | 66° 00.11 | 1860  | Megacore | Bulk sediment organics  |
| Pakistan | 56005#04 | 22° 52.26 | 66° 59.80 | 1864  | Megacore | Bulk sediment organics  |
| Pakistan | 56001#04 | 22° 52.55 | 66° 59.93 | 1860  | Megacore | Bulk sediment organics  |
| Pakistan | 56137#13 | 22° 52.39 | 66° 59.94 | 1853  | Megacore | Bulk sediment organics  |
| Pakistan | 56101#10 | 23° 16.77 | 66° 42.71 | 132   | Megacore | Foraminiferal isotopes  |
| Pakistan | 56101#04 | 23° 16.79 | 66° 42.70 | 133   | Megacore | Foraminiferal isotopes  |
| Pakistan | 56105#05 | 23° 12.49 | 66° 34.01 | 285.4 | Megacore | Foraminiferal isotopes  |
| Pakistan | 56116#04 | 22° 53.53 | 66° 36.64 | 943   | Megacore | Foraminiferal isotopes  |
| Pakistan | 56116#06 | 22° 53.52 | 66° 36.64 | 943   | Megacore | Foraminiferal isotopes  |
| Pakistan | 56137#01 | 22° 52.39 | 66° 00.03 | 1853  | Megacore | Foraminiferal isotopes  |
| Pakistan | 56137#02 | 22° 52.41 | 66° 00.04 | 1853  | Megacore | Foraminiferal isotopes  |
| Pakistan | 56139#01 | 22° 59.99 | 66° 24.41 | 1192  | Megacore | Foraminiferal isotopes  |
| Pakistan | 56139#02 | 22° 59.98 | 66° 24.42 | 1193  | Megacore | Foraminiferal isotopes  |

Table S2:  $\delta^{13}\text{C}$  and  $\delta^{15}\text{N}$  composition of foraminifera given at species level, from both the Oman and Pakistan margins. Depth (m), dissolved oxygen ( $\mu\text{m}$ ), OMZ zone (see manuscript text) and foraminiferal type are all given. The Tubothalamea marked i and ii have agglutinated and calcareous walls, respectively.

| Margin | Depth (m)      | Oxygen ( $\mu\text{m}$ ) | Zone  | Family               | Species                        | $\delta^{13}\text{C}$ | $\delta^{15}\text{N}$ | Type                      |
|--------|----------------|--------------------------|-------|----------------------|--------------------------------|-----------------------|-----------------------|---------------------------|
| Oman   | 363            | 14.73                    | UTZ   | Vaginulinidae        | <i>Amphicoryna sublineata</i>  | n.d.                  | 3.2                   | Calcareous                |
| Oman   | 504            | 5.1                      | CORE  | Vaginulinidae        | <i>Lenticulina</i> sp.         | n.d.                  | 7.0                   | Calcareous                |
| Oman   | 789            | 6.25                     | CORE  | Buliminidae          | <i>Globobulimina turgida</i>   | n.d.                  | 6.3                   | Calcareous                |
| Oman   | 789            | 6.25                     | CORE  | Eggerellidae         | <i>Karreriella</i> sp.         | -20.0                 | 5.3                   | Textulariid               |
| Oman   | 789            | 6.25                     | CORE  | Eggerellidae         | <i>Karreriella</i> sp.         | -22.3                 | 5.5                   | Textulariid               |
| Oman   | 1103           | 16.51                    | LB    | Foraminifera         | unidentified                   | n.d.                  | 8.8                   |                           |
| Oman   | 1103           | 16.51                    | LB    | Nonionidae           | <i>Nonionella</i> sp.          | -21.6                 | 7.2                   | Calcareous                |
| Oman   | 1390           | 27.2                     | LB    | Hormosinidae         | <i>Reophax</i> spp.            | n.d.                  | 0.7                   | Textulariid               |
| Oman   | 1390           | 27.2                     | LB    | Ammodiscidae         | <i>Ammodiscus</i> sp.          | n.d.                  | 2.1                   | <sup>i</sup> Tubothalamea |
| Oman   | 1390           | 27.2                     | LB    | Haplophragmoididae   | <i>Veloroninoides scitulus</i> | n.d.                  | 3.5                   | Textulariid               |
| Oman   | 1390           | 27.2                     | LB    | Planulinidae         | <i>Hyalina baltica</i>         | n.d.                  | 4.7                   | Calcareous                |
| Oman   | 1390           | 27.2                     | LB    | Parrelloididae       | <i>Cibicidoides</i> sp.        | n.d.                  | 5.3                   | Calcareous                |
| Oman   | 1390           | 27.2                     | LB    | Uvigerinidae         | <i>Uvigerina hollicki</i>      | -19.0                 | 7.8                   | Calcareous                |
| Oman   | 1414           | 29.9                     | LB    | Chilostomellidae     | <i>Chilostomella oolina</i>    | n.d.                  | 1.8                   | Calcareous                |
| Oman   | 1414           | 29.9                     | LB    | Parrelloididae       | <i>Cibicidoides</i> sp.        | n.d.                  | 5.7                   | Calcareous                |
| Oman   | 1414           | 29.9                     | LB    | Planulinidae         | <i>Hyalina baltica</i>         | -11.5                 | 6.8                   | Calcareous                |
| Oman   | 1414           | 29.9                     | LB    | Uvigerinidae         | <i>Uvigerina hollicki</i>      | n.d.                  | 8.7                   | Calcareous                |
| Oman   | 1390 +<br>1414 | 27-30                    | LB    | Buliminidae          | <i>Globobulimina</i> sp.       | n.d.                  | 3.3                   | Calcareous                |
| Oman   | 1390 +<br>1414 | 27-30                    | LB    | Hauerinidae          | <i>Pyrgo depressa</i>          | n.d.                  | 4.2                   | Calcareous                |
| Oman   | 2030           | 90.58                    | BELOW | Allogromida incertae | unidentified                   | -20.0                 | 7.1                   | Monothalamid              |

|          |      |       |       | sedis                      |                                                                        |       |      |                            |
|----------|------|-------|-------|----------------------------|------------------------------------------------------------------------|-------|------|----------------------------|
| Oman     | 2030 | 90.58 | BELOW | Buliminidae                | <i>Globobulimina</i> sp.                                               | n.d.  | 7.1  | Calcareous                 |
| Oman     | 2030 | 90.58 | BELOW | Foraminifera               | unidentified                                                           | n.d.  | 10.8 |                            |
| Oman     | 2030 | 90.58 | BELOW | Hauerinidae                | <i>Quinqueloculina</i> sp.                                             | n.d.  | 6.6  | <sup>ii</sup> Tubothalamea |
| Oman     | 2030 | 90.58 | BELOW | Hormosinidae               | <i>Reophax dentaliniformis</i>                                         | -19.4 | 6.2  | Textulariid                |
| Oman     | 2030 | 90.58 | BELOW | Hormosinidae               | <i>Reophax dentaliniformis</i>                                         | n.d.  | 7.8  | Textulariid                |
| Oman     | 2030 | 90.58 | BELOW | Psammosphaeridae           | <i>Psammosphaera</i> fusca with <i>Ammolagena clavata</i>              | -20.1 | 8.3  | Monothalamid               |
| Oman     | 2030 | 90.58 | BELOW | Psammosphaeridae           | <i>Psammosphaera</i> fusca with <i>Ammolagena clavata</i>              | -20.2 | 5.4  | Monothalamid               |
| Oman     | 2030 | 90.58 | BELOW | Uvigerinidae               | <i>Uvigerina hollicki</i>                                              | -20.1 | 4.1  | Calcareous                 |
| Oman     | 2030 | 90.58 | BELOW | Valvulinidae               | <i>Clavulina communis</i> var. sp.                                     | -20.3 | 9.3  | Textulariid                |
| Oman     | 3185 | 166   | BELOW | Komokiidae                 | <i>Lana</i> sp.                                                        | -21.3 | 8.5  | Monothalamid               |
| Oman     | 3185 | 166   | BELOW | Buliminidae                | <i>Globobulimina</i> sp.                                               | -20.7 | 3.1  | Calcareous                 |
| Oman     | 3185 | 166   | BELOW | Haplophragmoididae         | <i>Veleroninoides scitulus</i>                                         | -20.1 | 9.0  | Textulariid                |
| Oman     | 3185 | 166   | BELOW | Rhabdamminidae             | <i>Rhizammina</i> sp.                                                  | -21.2 | 10.0 | Monothalamid               |
| Oman     | 3185 | 166   | BELOW | Rhabdamminidae             | <i>Rhizammina</i> sp.                                                  | -20.7 | -2.6 | Monothalamid               |
| Oman     | 3185 | 166   | BELOW | Uvigerinidae               | <i>Uvigerina hollicki</i>                                              | n.d.  | -7.8 | Calcareous                 |
| Pakistan | 140  | 4.9   | SHZ   | Astrorhizidae              | <i>Pelosina</i> sp.                                                    | -21.1 | 9.7  | Monothalamid               |
| Pakistan | 140  | 4.9   | SHZ   | Buliminidae                | <i>Globobulimina</i> cf. <i>G. pyrula</i>                              | -24.5 | 20.2 | Calcareous                 |
| Pakistan | 140  | 4.9   | SHZ   | Allogromida incertae sedis | Unidentified                                                           | -20.5 | 11.5 | Monothalamid               |
| Pakistan | 140  | 4.9   | SHZ   | Rhabdamminidae             | <i>Bathysiphon</i> sp.                                                 | -23.3 | -3.9 | Monothalamid               |
| Pakistan | 140  | 4.9   | SHZ   |                            | <i>Bolivina</i> ex. gr. <i>dilatata</i> & <i>Cassidulina laevigata</i> | -20.5 | n.d. | Calcareous                 |
| Pakistan | 140  | 4.9   | SHZ   | Bagginidae                 | <i>Cancris auriculus</i>                                               | -23.2 | 16.6 | Calcareous                 |
| Pakistan | 140  | 4.9   | SHZ   | Bagginidae                 | <i>Cancris auriculus</i>                                               | -22.5 | 18.9 | Calcareous                 |
| Pakistan | 140  | 4.9   | SHZ   |                            | <i>G. pyrula</i> , <i>Lenticulina</i> sp., <i>C. auriculus</i>         | -22.0 | 1.8  | Calcareous                 |
| Pakistan | 140  | 4.9   | SHZ   | Astrorhizidae              | <i>Pelosina</i> sp.                                                    | -21.5 | 9.9  | Monothalamid               |
| Pakistan | 140  | 4.9   | SHZ   | Astrorhizidae              | <i>Pelosina</i> sp.                                                    | -20.0 | 5.1  | Monothalamid               |

|          |     |     |      |                |                                                                                    |       |      |              |
|----------|-----|-----|------|----------------|------------------------------------------------------------------------------------|-------|------|--------------|
| Pakistan | 140 | 4.9 | SHZ  | Hormosinidae   | <i>Reophax</i> sp. 1                                                               | -23.9 | 8.1  | Textulariid  |
| Pakistan | 140 | 4.9 | SHZ  | Hormosinidae   | <i>Reophax</i> sp. 1                                                               | -22.4 | 19.8 | Textulariid  |
| Pakistan | 140 | 4.9 | SHZ  | Uvigerinidae   | <i>Uvigerina</i> ex. gr. <i>semiornata</i>                                         | -23.7 | 11.4 | Calcareous   |
| Pakistan | 140 | 4.9 | SHZ  | Uvigerinidae   | <i>Uvigerina</i> ex. gr. <i>semiornata</i>                                         | -24.0 | 10.9 | Calcareous   |
| Pakistan | 140 | 4.9 | SHZ  | Uvigerinidae   | <i>Uvigerina</i> ex. gr. <i>semiornata</i>                                         | -23.6 | 11.0 | Calcareous   |
| Pakistan | 140 | 4.9 | SHZ  | Uvigerinidae   | <i>Uvigerina</i> ex. gr. <i>semiornata</i>                                         | -23.3 | 10.5 | Calcareous   |
| Pakistan | 140 | 4.9 | SHZ  | Uvigerinidae   | <i>Uvigerina</i> ex. gr. <i>semiornata</i>                                         | -23.4 | 9.1  | Calcareous   |
| Pakistan | 140 | 4.9 | SHZ  | Uvigerinidae   | <i>Uvigerina</i> ex. gr. <i>semiornata</i>                                         | -20.0 | 5.8  | Calcareous   |
| Pakistan | 140 | 4.9 | SHZ  | Uvigerinidae   | <i>Uvigerina</i> ex. gr. <i>semiornata</i>                                         | -23.2 | 5.8  | Calcareous   |
| Pakistan | 140 | 4.9 | SHZ  | Uvigerinidae   | <i>Uvigerina</i> ex. gr. <i>semiornata</i>                                         | -23.5 | 12.1 | Calcareous   |
| Pakistan | 300 | 4.9 | CORE | Buliminidae    | <i>Globobulimina</i> cf. <i>G. pyrula</i>                                          | -22.4 | 17.3 | Calcareous   |
| Pakistan | 300 | 4.9 | CORE | Buliminidae    | <i>Globobulimina</i> cf. <i>G. pyrula</i>                                          | -21.5 | 8.7  | Calcareous   |
| Pakistan | 300 | 4.9 | CORE | Astrorhizidae  | <i>Pelosina</i> sp.                                                                | -19.8 | 12.9 | Monothalamid |
| Pakistan | 300 | 4.9 | CORE | Rhabdamminidae | <i>Bathysiphon</i> sp.                                                             | -22.4 | -3.9 | Monothalamid |
| Pakistan | 300 | 4.9 | CORE | Mixture        | <i>C. laevigata</i> , <i>C. auriculus</i> , <i>Brizalina</i>                       | -22.2 | 13.6 |              |
| Pakistan | 300 | 4.9 | CORE | Mixture        | & <i>Cribostomoides</i> , <i>Ammodiscus</i>                                        | -22.2 | 13.6 |              |
| Pakistan | 300 | 4.9 | CORE |                | <i>Nemogullmia</i> , <i>Saccamminid</i> , <i>Allogromiid</i> , <i>Casperammina</i> | -21.8 | 12.0 | Monothalamid |
| Pakistan | 300 | 4.9 | CORE |                | <i>Saccamminid</i> , <i>Nemogullmia</i> , <i>Allogromiid</i> , <i>Lagenammina</i>  | -22.5 | n.d. | Monothalamid |
| Pakistan | 300 | 4.9 | CORE | Hormosinidae   | <i>Reophax dentaliniformis</i>                                                     | -21.8 | 3.8  | Textulariid  |
| Pakistan | 300 | 4.9 | CORE | Hormosinidae   | <i>Reophax dentaliniformis</i>                                                     | -21.0 | 1.6  | Textulariid  |
| Pakistan | 300 | 4.9 | CORE | Hormosinidae   | <i>Reophax dentaliniformis</i>                                                     | -19.8 | 13.3 | Textulariid  |
| Pakistan | 300 | 4.9 | CORE | Hormosinidae   | <i>Reophax dentaliniformis</i>                                                     | -22.5 | 16.0 | Textulariid  |
| Pakistan | 300 | 4.9 | CORE | Hormosinidae   | <i>Reophax</i> sp. 2                                                               | -23.5 | 13.1 | Textulariid  |
| Pakistan | 300 | 4.9 | CORE | Hormosinidae   | <i>Reophax</i> sp. 2                                                               | -22.2 | 12.1 | Textulariid  |
| Pakistan | 300 | 4.9 | CORE | Uvigerinidae   | <i>Uvigerina</i> ex. gr. <i>semiornata</i>                                         | -22.2 | 7.3  | Calcareous   |

|          |      |      |      |                    |                                                                                   |       |      |              |
|----------|------|------|------|--------------------|-----------------------------------------------------------------------------------|-------|------|--------------|
| Pakistan | 300  | 4.9  | CORE | Uvigerinidae       | <i>Uvigerina</i> ex. gr. <i>semiornata</i>                                        | -22.5 | 13.0 | Calcareous   |
| Pakistan | 300  | 4.9  | CORE | Uvigerinidae       | <i>Uvigerina</i> ex. gr. <i>semiornata</i>                                        | -19.9 | 12.1 | Calcareous   |
| Pakistan | 300  | 4.9  | CORE | Uvigerinidae       | <i>Uvigerina</i> ex. gr. <i>semiornata</i>                                        | -18.7 | 12.7 | Calcareous   |
| Pakistan | 940  | 7.6  | LTZ  | Hormosinidae       | <i>R. dentaliniformis</i> , <i>R. scorpiurus</i>                                  | -20.6 | 10.0 | Textulariid  |
| Pakistan | 940  | 7.6  | LTZ  | Chilostomellidae   | <i>Chilostomella ovoidea</i>                                                      | -21.2 | 11.2 | Calcareous   |
| Pakistan | 940  | 7.6  | LTZ  | Ammosphaeoidinidae | <i>Cribostomoides</i>                                                             | -21.1 | 10.8 | Calcareous   |
| Pakistan | 940  | 7.6  | LTZ  | Eggerellidae       | <i>Dorothia scabra</i>                                                            | -25.5 | 27.3 | Textulariid  |
| Pakistan | 940  | 7.6  | LTZ  | Eggerellidae       | <i>Dorothia scabra</i>                                                            | -22.5 | n.d. | Textulariid  |
| Pakistan | 940  | 7.6  | LTZ  |                    | <i>Bathysiphon</i> , <i>Hyperammina</i>                                           | -22.0 | 10.5 | Monothalamid |
| Pakistan | 940  | 7.6  | LTZ  |                    | <i>Ammodiscus</i> , <i>Cribostomoides</i> , <i>Lenticulina</i>                    | -20.5 | 11.4 |              |
| Pakistan | 940  | 7.6  | LTZ  |                    | & <i>Karreriella</i> , <i>Globobulimina</i> , <i>Cancris</i> , <i>Cassidulina</i> | -20.5 | 11.4 |              |
| Pakistan | 940  | 7.6  | LTZ  | Hormosinidae       | <i>Reophax</i> aff. <i>bilocularis</i>                                            | -21.3 | 9.0  | Textulariid  |
| Pakistan | 940  | 7.6  | LTZ  | Hormosinidae       | <i>Reophax</i> aff. <i>bilocularis</i>                                            | -21.0 | 9.3  | Textulariid  |
| Pakistan | 940  | 7.6  | LTZ  | Hormosinidae       | <i>Reophax</i> aff. <i>bilocularis</i>                                            | -20.5 | 10.0 | Textulariid  |
| Pakistan | 940  | 7.6  | LTZ  | Hormosinidae       | <i>Reophax</i> aff. <i>bilocularis</i>                                            | -21.0 | 9.0  | Textulariid  |
| Pakistan | 940  | 7.6  | LTZ  | Hormosinidae       | <i>Reophax</i> aff. <i>bilocularis</i>                                            | -21.6 | 9.2  | Textulariid  |
| Pakistan | 940  | 7.6  | LTZ  | Hormosinidae       | <i>Reophax</i> aff. <i>bilocularis</i>                                            | -21.6 | 9.4  | Textulariid  |
| Pakistan | 940  | 7.6  | LTZ  | Hormosinidae       | <i>Reophax</i> aff. <i>bilocularis</i>                                            | -20.5 | 11.2 | Textulariid  |
| Pakistan | 940  | 7.6  | LTZ  | Hormosinidae       | <i>Reophax</i> aff. <i>bilocularis</i>                                            | -20.3 | 10.3 | Textulariid  |
| Pakistan | 940  | 7.6  | LTZ  | Hormosinidae       | <i>Reophax</i> aff. <i>bilocularis</i>                                            | -20.5 | 11.1 | Textulariid  |
| Pakistan | 940  | 7.6  | LTZ  | Hormosinidae       | <i>Reophax</i> aff. <i>bilocularis</i>                                            | -19.4 | 15.2 | Textulariid  |
| Pakistan | 1200 | 15.6 | LB   |                    | <i>H. baltica</i> , <i>B. aculeata</i> , <i>C. oolina</i> , <i>C. ovoidea</i>     | -22.0 | n.d. | Calcareous   |
| Pakistan | 1200 | 15.6 | LB   |                    | & <i>H. elegans</i> , <i>P. pupoide</i>                                           | -22.0 | n.d. | Calcareous   |
| Pakistan | 1200 | 15.6 | LB   |                    | <i>Nodellum</i> , <i>G. aff. pyrula</i> , <i>Melonis</i> , <i>H. baltica</i>      | -21.7 | 9.1  |              |
| Pakistan | 1200 | 15.6 | LB   |                    | & <i>Ammodiscus</i> , <i>Cribostomoides</i> ,                                     | -21.7 | 9.1  |              |
| Pakistan | 1200 | 15.6 | LB   |                    | & <i>Saccamminids</i> , <i>Bathysiphon</i> , <i>Allogromiid</i>                   | -21.7 | 9.1  |              |

|          |      |      |       |                |                                                          |       |      |              |
|----------|------|------|-------|----------------|----------------------------------------------------------|-------|------|--------------|
| Pakistan | 1200 | 15.6 | LB    | Hormosinidae   | <i>Rheophax scorpiurus</i>                               | -22.3 | 16.0 | Textulariid  |
| Pakistan | 1200 | 15.6 | LB    | Hormosinidae   | <i>R. bilocularis, R. scorpiurus, R. dentaliniformis</i> | -20.8 | 0.0  | Textulariid  |
| Pakistan | 1200 | 15.6 | LB    | Hormosinidae   | <i>Reophax aff. bilocularis</i>                          | -20.8 | 10.6 | Textulariid  |
| Pakistan | 1200 | 15.6 | LB    | Hormosinidae   | <i>Reophax aff. bilocularis</i>                          | -21.6 | 11.7 | Textulariid  |
| Pakistan | 1200 | 15.6 | LB    | Hormosinidae   | <i>Reophax aff. bilocularis</i>                          | -21.0 | 10.9 | Textulariid  |
| Pakistan | 1200 | 15.6 | LB    | Hormosinidae   | <i>Reophax aff. bilocularis</i>                          | -21.2 | 11.1 | Textulariid  |
| Pakistan | 1200 | 15.6 | LB    | Hormosinidae   | <i>R. bilocularis, R. scorpiurus, R. dentaliniformis</i> | -22.0 | 8.6  | Textulariid  |
| Pakistan | 1200 | 15.6 | LB    | Astrorhizidae  | <i>Pelosina sp.</i>                                      | -23.1 | 6.9  | Monothalamid |
| Pakistan | 1850 | 73.6 | BELOW | Komokiidae     | <i>Komoki sp. &amp; Lana sp.</i>                         | -21.1 | 2.7  | Monothalamid |
| Pakistan | 1850 | 73.6 | BELOW |                | <i>Allogromiid, Nodellum, Psammospaerid</i>              | -20.6 | 7.2  | Monothalamid |
| Pakistan | 1850 | 73.6 | BELOW |                | <i>H. elegans, B. affinis</i>                            | -19.8 | 10.7 |              |
| Pakistan | 1850 | 73.6 | BELOW |                | <i>&amp; Cyclamina sp., Cribostomoides sp.</i>           | -19.8 | 10.7 |              |
| Pakistan | 1850 | 73.6 | BELOW | Astrorhizidae  | <i>Pelosina sp.</i>                                      | -20.7 | 8.7  | Monothalamid |
| Pakistan | 1850 | 73.6 | BELOW | Hormosinidae   | <i>R. bilocularis, R. scorpiurus, R. dentaliniformis</i> | -20.3 | 16.1 | Textulariid  |
| Pakistan | 1850 | 73.6 | BELOW | Rhabdamminidae | <i>Rhizammina sp.</i>                                    | -21.1 | 6.7  | Monothalamid |
| Pakistan | 1850 | 73.6 | BELOW | Rhabdamminidae | <i>Rhizammina sp.</i>                                    | -21.4 | 7.8  | Monothalamid |
| Pakistan | 1850 | 73.6 | BELOW | Rhabdamminidae | <i>Rhizammina sp.</i>                                    | -22.1 | 7.2  | Monothalamid |
| Pakistan | 1850 | 73.6 | BELOW |                | <i>Nodosium, Bathysiphon, Crithionina</i>                | -19.9 | 9.5  |              |
| Pakistan | 1850 | 73.6 | BELOW |                | <i>&amp; Cyclamina, Cribostomoides</i>                   | -19.9 | 9.5  |              |
